# Supplementary material for: Landfill leachate contributes per-/poly-fluoroalkyl substances (PFAS) and pharmaceuticals to municipal wastewater
Source: Royal Society of Chemistry journal article supplement (doi:10.1039/d0ew00045k), 2020-01-01
Supplement: d0ew00045k1.xlsx [file d0ew00045k1.xlsx]

## Sheet: TabSI_1-QA_replicateSums
Analytical Method	Number of detections in replicate samples	25th percentile relative percent difference (%)	50th percentile relative percent difference (%)	75th percentile relative percent difference (%)	Mean percentile relative percent difference (%)
LC-MS/MS pharmaceuticals	64	3.40199	6.28379	12.464	9.26039
LC-MS/MS PFAS	32	12.9412	26.7619	36.0749	27.5328
GC-MS/MS hormones	9	28.5714	48.7226	90.3226	62.322
#Table SI-1. Summary statistics of relative percent differences (RPDs) calculated between field and replicate samples.
#[Relative percent difference (RPD) = |A − B|/((A + B)/2) × 100.]
#[ LC-MS/MS, liquid chromatography-tandem mass spectrometry; GC-MS/MS, gas chromatography-tandem mass spectrometry; PFAS, per-/poly-fluoroalkyl substance(s)]

## Sheet: TableSI_2QA_ISD_Surr_recoveries
Analytical Method	Number of IDSs and surrogates	25th percentile IDS/surrogate recovery (%)	50th percentile IDS/surrogate recovery (%)	75th percentile IDS/surrogate recovery (%)	Mean percentile IDS/surrogate recovery (%)
LC-MS/MS pharmaceuticals	19	93.9	102	116	109.17
LC-MS/MS PFAS	29	41	68	87	78
GC-MS/MS hormones	14	43.65	67.9	75.625	63.0711
#Table SI-2. Summary statistics of lab provided recoveries for isotope-dilution standard (IDS) and surrogate compounds added to field and quality-assurance samples.
#[ LC-MS/MS, liquid chromatography-tandem mass spectrometry; GC-MS/MS, gas chromatography-tandem mass spectrometry; PFAS, per-/poly-fluoroalkyl substance(s)]

## Sheet: Table SI-3_allhits
Analytical Method	Parameter Name	Chemical Class	Chemical Use	Reporting Level (ng/L)	Landfill A 10-19-2016 16:20	Landfill B 09-15-2016 10:45	Landfill C 07-30-2016 14:20	WWTP A-INF 10-20-2016* Median	WWTP B-INF 09-15-2016 13:05	WWTP C-INF 07-30-2016 04:55	WWTP D-INF 07-10-2016 10:08	WWTP E-INF 07-08-2016 10:47	WWTP A-EF 10-20-2016* Median	WWTP B-EF 09-15-2016 13:10	WWTP C-EF 07-30-2016 13:07	WWTP D-EF 07-10-2016 10:47	WWTP E-EF 07-08-2016 08:59	WWTP A-INF 10-19-2016 1500	WWTP A-INF 10-19-2016 2000	WWTP A-INF 10-20-2016 00:00	WWTP A-INF 10-20-2016 06:30	WWTP A-INF 10-20-2016 12:45	WWTP A-EF 10-19-2016 1500	WWTP A-EF 10-19-2016 2000	WWTP A-EF 10-20-2016 00:00	WWTP A-EF 10-20-2016 06:30	WWTP A-EF 10-20-2016 12:45
GC-MS/MS hormones	11-ketotestosterone	hormone	natural androgen	2.0 - 17.1	<2.0	<2.0	<2.0	E 31.4	E 37.6	<17.1	24.6	59.9	<2.0	<2.0	<2.0	<2.0	<2.0	<54.5	E 31.4	<28.5	<56.3	<47.5	<2.0	<2.0	<2.0	<2.0	<2.0
GC-MS/MS hormones	17-beta-estradiol	hormone	natural estrogen	1.6 - 4.0	<1.6	<1.6	<1.6	13.4	E 14.9	21.1	13.9	10.1	<1.6	<1.6	<1.6	<1.6	<1.6	10.6	14.3	13.4	15.4	11.7	<1.6	<1.6	<1.6	<1.6	<1.6
GC-MS/MS hormones	3-beta-coprostanol	plant animal sterol	fecal indicator	200	176000	E 32690	<200	486000	738000	527000	1230000	1310000	E 768	494	288	442	1165	486000	580000	613000	421000	430000	E 765	E 768	E 983	E 1210	E 586
GC-MS/MS hormones	4,4'-bisphenol f	household	plasticizer	10.0	E 1050	E 1281	<10.0	E 36.0	E 53.0	E 175	E 44.0	E 37.0	<10	<10.0	<10.0	<10.0	<10.0	35	E 36.0	E 36.0	42	35	<10.0	<10.0	<10.0	<10.0	<10.0
GC-MS/MS hormones	4-androstene-3,17-dione	hormone	natural androgen: testosterone precursor	2.0	E 58.0	E 81.1	<2.0	E 168	E 192	93	102	400	2.9	<2.0	<2.0	<2.0	<2.0	E 206	E 188	E 109	E 168	112	2.9	<3.9	2.9	<2.0	3
GC-MS/MS hormones	bisphenol a	industrial	component for plastics and thermal paper	100	116000	E 516000	E 628	E 1190	E 18800	E 25300	258	E 618	<100	<100	<100	<100	<100	E 2655	E 1022	E 555	E 2680	E 1191	<100	<100	<100	<100	<100
GC-MS/MS hormones	cholesterol	plant animal sterol	plant animal sterol	400	131000	E 3262	1800	580000	511000	659000	885000	1120000	E 1600	<400	<400	<400	1020	580000	694000	687000	525000	476000	<712	<783	<1349	E 1600	<670
GC-MS/MS hormones	cis-androsterone	hormone	natural androgen	2.0	<2.0	E 260	<2.0	13800	3940	7970	5900	5240	<2.0	<2.0	<2.0	<2.0	<2.0	14610	19000	13800	12100	13600	<2.0	<2.0	<2.0	<2.0	<2.0
GC-MS/MS hormones	dihydrotestosterone	hormone	natural androgen	4.0 - 104	<104	<4.0	<4.0	154	E 172	182	140	307	<4.0	<4.0	<4.0	<4.0	<4.0	E 154	E 206	E 146	E 283	135	<4.0	<4.0	<4.0	<4.0	<4.0
GC-MS/MS hormones	epitestosterone	hormone	natural androgen	2.0 - 47.8	<2.0	<2.0	<2.0	E 30.0	<2.0	<2.0	<2.0	<47.8	<2.0	<2.0	<2.0	<2.0	<2.0	E 29.7	<20.4	<2.0	<24.5	<2.0	<2.0	<2.0	<2.0	<2.0	<2.0
GC-MS/MS hormones	estriol	hormone	natural estrogen	2.0	13.5	<2.0	<2.0	248	E 114	208	204	181	<2.0	<2.0	<2.0	<2.0	<2.0	248	297	227	197	284	<2.0	<2.0	<2.0	<2.0	<2.0
GC-MS/MS hormones	estrone	hormone	estradiol degradate	2.0 - 14.1	E 14.1	<14.1	<2.0	39.5	E 51.6	E 45.5	41.8	52.1	3	<2.7	<2.0	<2.2	12.2	44.2	51.2	39.5	34.5	39.3	<2.0	<2.0	3.5	2.3	<2.0
GC-MS/MS hormones	progesterone	hormone	natural progestogen	12.0 - 29.1	X-DLTD	<12.0	<12.0	X-DLTD	X-DLTD	X-DLTD	<29.1	E 52.1	<12.0	<12.0	<12.0	<12.0	<12.0	X-DLTD	X-DLTD	X-DLTD	X-DLTD	X-DLTD	<12.0	<12.0	<12.0	<12.0	<12.0
GC-MS/MS hormones	testosterone	hormone	natural androgen	1.6 - 48.6	<1.6	<1.6	<1.6	48.5	<48.6	<25.0	30.5	71.1	<1.6	<1.6	<1.6	<1.6	<1.6	E 51.3	E 45.9	E 34.7	E 51.1	<28.3	<1.6	<1.6	<1.6	<1.6	<1.6
LC-MS/MS PFAS	10:2 disubstituted polyfluoroalkyl phosphate (10:2 diPAP)	PFAS	disubstituted polyfluoroalkyl phosphate-7	10	<10.0	<10.0	<10.0	<10.0	12	14	<10.0	<10.0	<10.0	<10.0	<10.0	<10.0	<10.0	<10.0	<10.0	<10.0	<10.0	<10.0	<10.0	<10.0	<10.0	<10.0	<10.0
LC-MS/MS PFAS	1H,1H,2H,2H-perfluoro-1-octanesulfonate (6:2 FtS)	PFAS	fluorotelomer sulfonates-4	10	1200	220	240	740	25	58	<10.0	<10.0	20	<10.0	<10.0	7.8	<10.0	740	<10.0	<10.0	<10.0	<10.0	12	28	<10.0	<10.0	<10.0
LC-MS/MS PFAS	2H-perfluoro-2-decenoic acid (FOUEA)	PFAS	perfluoro-2-alkyl acids-4	25	84	<25.0	<25.0	<25.0	<25.0	<25.0	<25.0	<25.0	<25.0	<25.0	<25.0	<25.0	<25.0	<25.0	<25.0	<25.0	<25.0	<25.0	<25.0	<25.0	<25.0	<25.0	<25.0
LC-MS/MS PFAS	2H-perfluoro-2-dodecenoic acid (FDUEA)	PFAS	perfluoro-2-alkyl acids-4	25	11	<25.0	<25.0	<25.0	<25.0	<25.0	<25.0	<25.0	<25.0	<25.0	<25.0	<25.0	8.5	<25.0	<25.0	<25.0	<25.0	<25.0	<25.0	<25.0	<25.0	<25.0	<25.0
LC-MS/MS PFAS	2H-perfluoro-2-hexenoic acid (FBUEA)	PFAS	perfluoro-2-alkyl acids-4	25	<25.0	<25.0	<25.0	<25.0	55	<25.0	<25.0	<25.0	<25.0	<25.0	<25.0	<25.0	<25.0	<25.0	<25.0	<25.0	<25.0	<25.0	<25.0	<25.0	<25.0	<25.0	<25.0
LC-MS/MS PFAS	2H-perfluoro-2-octenoic acid (FHUEA)	PFAS	perfluoro-2-alkyl acids-4	25	76	<25.0	<25.0	17	<25.0	<25.0	<25.0	<25.0	<25.0	<25.0	<25.0	<25.0	<25.0	17	<25.0	<25.0	<25.0	<25.0	<25.0	<25.0	<25.0	<25.0	<25.0
LC-MS/MS PFAS	2-perfluorodecylethanoic acid (FDEA)	PFAS	perfluoroalkylethanoic acids-4	25	18	<25.0	<25.0	<25.0	<25.0	<25.0	<25.0	<25.0	<25.0	<25.0	<25.0	<25.0	<25.0	<25.0	<25.0	<25.0	<25.0	<25.0	<25.0	<25.0	<25.0	<25.0	<25.0
LC-MS/MS PFAS	2-perfluorohexylethanoic acid (FHEA)	PFAS	perfluoroalkylethanoic acids-4	25	2400	<25.0	<25.0	<25.0	<25.0	<25.0	<25.0	<25.0	<25.0	<25.0	<25.0	<25.0	<25.0	<25.0	<25.0	<25.0	<25.0	<25.0	<25.0	<25.0	<25.0	<25.0	<25.0
LC-MS/MS PFAS	2-perfluorooctylethanoic acid (FOEA)	PFAS	perfluoroalkylethanoic acids-4	25	960	600	<25.0	<25.0	<25.0	<25.0	<25.0	<25.0	<25.0	<25.0	<25.0	<25.0	<25.0	<25.0	<25.0	<25.0	<25.0	<25.0	<25.0	<25.0	<25.0	<25.0	<25.0
LC-MS/MS PFAS	3-Perfluoroheptyl propanoic acid (7:3) (FHpPA)	PFAS	perfluoroalkyl propanoic acid (n:3)-4	25	360	590	<25.0	<25.0	48	<25.0	<25.0	<25.0	<25.0	<25.0	<25.0	<25.0	<25.0	<25.0	<25.0	<25.0	<25.0	<25.0	<25.0	<25.0	<25.0	<25.0	<25.0
LC-MS/MS PFAS	3-Perfluoropentyl propanoic acid (5:3) (FPePA)	PFAS	perfluoroalkyl propanoic acid (n:3)-4	10	2800	4600	1200	30	170	56	<10.0	<10.0	<10.0	<10.0	<10.0	<10.0	<10.0	30	<10.0	<10.0	<10.0	<10.0	<10.0	<10.0	<10.0	<10.0	<10.0
LC-MS/MS PFAS	3-Perfluoropropyl propanoic acid (3:3) (FPrPA)	PFAS	perfluoroalkyl propanoic acid (n:3)-4	10	75	<10.0	<10.0	<10.0	<10.0	<10.0	<10.0	<10.0	<10.0	<10.0	<10.0	<10.0	<10.0	<10.0	<10.0	<10.0	<10.0	<10.0	<10.0	<10.0	<10.0	<10.0	<10.0
LC-MS/MS PFAS	6:2 disubstituted polyfluoroalkyl phosphate (6:2 diPAP)	PFAS	disubstituted polyfluoroalkyl phosphate-7	50	<50.0	<50.0	<50.0	V 79.0	V 63.0	<50.0	<50.0	<50.0	<50.0	<50.0	<50.0	<50.0	<50.0	V 79.0	<50.0	<50.0	<50.0	<50.0	<50.0	<50.0	<50.0	<50.0	<50.0
LC-MS/MS PFAS	6:2/8:2 disubstituted polyfluoroalkyl phosphate (6:2/8:2 diPAP)	PFAS	disubstituted polyfluoroalkyl phosphate-7	10	14	<10.0	<10.0	14	15	17	<10.0	15	<10.0	<10.0	<10.0	<10.0	<10.0	18	12	12	14	14	<10.0	<10.0	<10.0	<10.0	<10.0
LC-MS/MS PFAS	8:2 disubstituted polyfluoroalkyl phosphate (8:2 diPAP)	PFAS	disubstituted polyfluoroalkyl phosphate-7	10	32	<10.0	<10.0	26	30	35	22	<10.0	24	<10.0	<10.0	<10.0	<10.0	38	26	24	26	24	<10.0	<10.0	<10.0	<10.0	24
LC-MS/MS PFAS	8:2/10:2 disubstituted polyfluoroalkyl phosphate (8:2/10:2 diPAP)	PFAS	disubstituted polyfluoroalkyl phosphate-7	10	17	<10.0	<10.0	14	21	19	<10.0	12	13	<10.0	<10.0	<10.0	<10.0	16	12	17	12	<10.0	<10.0	13	<10.0	<10.0	<10.0
LC-MS/MS PFAS	ethyl perfluorobutane sulfonamido acetic acid (EtFBSAA)	PFAS	n-ethyl perfluroalkane sulfonamido acetic acids-5	10	200	<10.0	97	<10.0	<10.0	<10.0	<10.0	<10.0	<10.0	<10.0	<10.0	<10.0	<10.0	<10.0	<10.0	<10.0	<10.0	<10.0	<10.0	<10.0	<10.0	<10.0	<10.0
LC-MS/MS PFAS	ethyl perfluorohexane sulfonamido acetic acid (EtFHxSAA)	PFAS	n-ethyl perfluroalkane sulfonamido acetic acids-5	10	73	<10.0	<10.0	<10.0	<10.0	<10.0	<10.0	<10.0	<10.0	<10.0	<10.0	<10.0	<10.0	<10.0	<10.0	<10.0	<10.0	<10.0	<10.0	<10.0	<10.0	<10.0	<10.0
LC-MS/MS PFAS	ethyl perfluorooctane sulfonamide acetic acid (EtFOSAA)	PFAS	n-ethyl perfluroalkane sulfonamido acetic acids-5	10	230	650	170	<10.0	36	28	<10.0	<10.0	<10.0	<10.0	<10.0	<10.0	<10.0	<10.0	<10.0	<10.0	<10.0	<10.0	<10.0	<10.0	<10.0	<10.0	<10.0
LC-MS/MS PFAS	ethyl perfluoropentane sulfonamido acetic acid (EtFPeSAA)	PFAS	n-ethyl perfluroalkane sulfonamido acetic acids-5	10	120	930	72	<10.0	<10.0	<10.0	<10.0	<10.0	<10.0	<10.0	<10.0	<10.0	<10.0	<10.0	<10.0	<10.0	<10.0	<10.0	<10.0	<10.0	<10.0	<10.0	<10.0
LC-MS/MS PFAS	methyl perfluorobutane sulfonamido acetic acid (MeFBSAA)	PFAS	n-ethyl perfluroalkane sulfonamido acetic acids-5	10	2400	3700	650	49	330	63	<10.0	<10.0	55	53	<10.0	62	50	49	<10.0	<10.0	<10.0	<10.0	<10.0	63	<10.0	<10.0	46
LC-MS/MS PFAS	methyl perfluoroheptane sulfonamido acetic acid (MeFHpSAA)	PFAS	n-ethyl perfluroalkane sulfonamido acetic acids-5	10	17	91	<10.0	<10.0	<10.0	<10.0	<10.0	<10.0	<10.0	<10.0	<10.0	<10.0	<10.0	<10.0	<10.0	<10.0	<10.0	<10.0	<10.0	<10.0	<10.0	<10.0	<10.0
LC-MS/MS PFAS	methyl perfluorohexane sulfonamido acetic acid (MeFHxSAA)	PFAS	n-ethyl perfluroalkane sulfonamido acetic acids-5	10	310	<10.0	330	<10.0	58	<10.0	<10.0	<10.0	<10.0	<10.0	<10.0	<10.0	<10.0	<10.0	<10.0	<10.0	<10.0	<10.0	<10.0	<10.0	<10.0	<10.0	<10.0
LC-MS/MS PFAS	methyl perfluorooctane sulfonamide acetic acid (MeFOSAA)	PFAS	n-ethyl perfluroalkane sulfonamido acetic acids-5	10	230	920	140	<10.0	<10.0	<10.0	<10.0	<10.0	<10.0	<10.0	<10.0	<10.0	<10.0	<10.0	<10.0	<10.0	<10.0	<10.0	<10.0	<10.0	<10.0	<10.0	<10.0
LC-MS/MS PFAS	methyl perfluoropentane sulfonamido acetic acid (MeFPeSAA)	PFAS	n-ethyl perfluroalkane sulfonamido acetic acids-5	10	680	7600	790	<10.0	<10.0	48	<10.0	<10.0	<10.0	<10.0	<10.0	<10.0	<10.0	<10.0	<10.0	<10.0	<10.0	<10.0	<10.0	<10.0	<10.0	<10.0	<10.0
LC-MS/MS PFAS	n-ethyl perfluorooctanesulfonamidoethanol-based phosphate diester (SAmPAP)	PFAS	n-ethyl perfluorooctanesulfonamidoethanol-based phosphate diester (SAmPAP)-1	10	55	<10.0	<10.0	<10.0	<10.0	<10.0	<10.0	<10.0	<10.0	<10.0	<10.0	<10.0	<10.0	<10.0	<10.0	<10.0	<10.0	<10.0	<10.0	<10.0	<10.0	<10.0	<10.0
LC-MS/MS PFAS	perfluoro-1-butanesulfonate (PFBS)	PFAS	perfluoroalkyl sulfonates-9	10	1600	1900	2200	13	120	32	<10.0	<10.0	21	51	54	9.4	9.6	12	13	<10.0	14	<10.0	21	30	16	<10.0	21
LC-MS/MS PFAS	perfluoro-1-heptanesulfonate (PFHpS)	PFAS	perfluoroalkyl sulfonates-9	10	<10.0	<10.0	22	<10.0	<10.0	<10.0	<10.0	<10.0	<10.0	<10.0	<10.0	<10.0	<10.0	<10.0	<10.0	<10.0	<10.0	<10.0	<10.0	<10.0	<10.0	<10.0	<10.0
LC-MS/MS PFAS	perfluoro-1-hexanesulfonate (PFHxS)	PFAS	perfluoroalkyl sulfonates-9	10	720	4100	1200	11	150	14	<10.0	<10.0	10	54	29	<10.0	5.8	5.8	16	<10.0	<10.0	<10.0	13	<10.0	<10.0	<10.0	6.1
LC-MS/MS PFAS	perfluoro-1-octanesulfonate (PFOS)	PFAS	perfluoroalkyl sulfonates-9	10	360	890	860	<10.0	66	22	<10.0	<10.0	<10.0	<10.0	<10.0	<10.0	<10.0	<10.0	<10.0	<10.0	<10.0	<10.0	<10.0	<10.0	<10.0	<10.0	<10.0
LC-MS/MS PFAS	perfluoro-1-pentanesulfonate (PFPeS)	PFAS	perfluoroalkyl sulfonates-9	10	<10.0	82	77	<10.0	<10.0	<10.0	<10.0	<10.0	<10.0	<10.0	<10.0	<10.0	<10.0	<10.0	<10.0	<10.0	<10.0	<10.0	<10.0	<10.0	<10.0	<10.0	<10.0
LC-MS/MS PFAS	perfluorodecanoic acid (PFDA)	PFAS	perfluoroalkyl carboxylates (PFCAs)-12	10	110	120	600	<10.0	<10.0	18	<10.0	<10.0	21	<10.0	<10.0	<10.0	<10.0	<10.0	<10.0	<10.0	<10.0	<10.0	<10.0	<10.0	21	<10.0	<10.0
LC-MS/MS PFAS	perfluorododecanoic acid (PFDoA)	PFAS	perfluoroalkyl carboxylates (PFCAs)-12	10	<10.0	<10.0	59	<10.0	<10.0	<10.0	<10.0	<10.0	<10.0	<10.0	<10.0	<10.0	<10.0	<10.0	<10.0	<10.0	<10.0	<10.0	<10.0	<10.0	<10.0	<10.0	<10.0
LC-MS/MS PFAS	perfluoroheptanoic acid (PFHpA)	PFAS	perfluoroalkyl carboxylates (PFCAs)-12	10	1400	6500	2300	54	350	62	72	<10.0	63	200	43	78	69	120	54	<10.0	<10.0	45	130	71	54	<10.0	53
LC-MS/MS PFAS	perfluorohexanoic acid (PFHxA)	PFAS	perfluoroalkyl carboxylates (PFCAs)-12	10	4200	8300	3600	85	470	100	110	<10.0	120	260	84	220	76	210	71	55	98	<10.0	120	110	140	18	130
LC-MS/MS PFAS	perfluorononanoic acid (PFNA)	PFAS	perfluoroalkyl carboxylates (PFCAs)-12	10	120	68	130	<10.0	<10.0	<10.0	<10.0	<10.0	<10.0	<10.0	<10.0	<10.0	<10.0	<10.0	<10.0	<10.0	<10.0	<10.0	<10.0	<10.0	<10.0	<10.0	<10.0
LC-MS/MS PFAS	perfluorooctanoic acid (PFOA)	PFAS	perfluoroalkyl carboxylates (PFCAs)-12	740	V 370	V 4800	V 3700	V 1100	V 1400	V 790	V 920	V 1000	V 1150	V 1200	<740	V 1200	V 1200	V 1100	V 1100	V 1100	V 1100	V 1100	V 1200	V 1100	V 1000	<740	V 1200
LC-MS/MS PFAS	perfluoropentanoic acid (PFPeA)	PFAS	perfluoroalkyl carboxylates (PFCAs)-12	10	<10.0	2000	1400	<10.0	<10.0	<10.0	<10.0	<10.0	88	<10.0	120	530	<10.0	<10.0	<10.0	<10.0	<10.0	<10.0	83	<10.0	92	<10.0	<10.0
LC-MS/MS PFAS	perfluoroundecanoic acid (PFUdA)	PFAS	perfluoroalkyl carboxylates (PFCAs)-12	10	<10.0	<10.0	<10.0	62	<10.0	<10.0	<10.0	<10.0	<10.0	<10.0	<10.0	<10.0	<10.0	62	<10.0	<10.0	<10.0	<10.0	<10.0	<10.0	<10.0	<10.0	<10.0
LC-MS/MS pharmaceuticals	1,7-dimethylxanthine	nonprescription	caffiene-metabolite	87.7 - 2800	E 1870	<2800	<87.7	E 22500	E 17000	E 6820	E 10300	<9650	E 1560	<140	<87.7	<87.7	<87.7	E 22200	E 28100	E 22500	E 18600	E 24100	<88.0	E 812	E 1560	E 1580	<275
LC-MS/MS pharmaceuticals	10-hydroxy-amitriptyline	prescription	metabolite	8.3 - 166	<8.30	<166	<8.3	30.8	94.3	45.5	26	27.8	<8.3	<8.3	<8.3	<8.3	<8.3	25	35.8	30.8	25.8	34.8	<8.3	<8.3	<8.3	<8.3	<8.3
LC-MS/MS pharmaceuticals	abacavir	prescription	antiviral: reverse transcriptase inhibitor	8.2 - 164	<8.20	<164	<8.2	60.7	29.9	45	63.1	53	<8.2	<8.2	<8.2	<8.2	<8.2	62.6	87.5	60.3	60.7	49.6	<8.2	<8.2	<8.2	<8.2	<8.2
LC-MS/MS pharmaceuticals	acetaminophen	nonprescription	pain relief	7.2 - 400	E 13300	<400	<564	E 54600	<20.0	E 58100	E 22200	60900	<20.0	<20.0	<7.2	<20.0	<20.0	E 54500	E 64400	E 54600	E 41400	E 62800	<20.0	<20.0	<20.0	<20.0	<20.0
LC-MS/MS pharmaceuticals	acyclovir	prescription	antiviral HIV	22.2 - 440	<22.2	<440	<22.2	E 5450	20700	5070	4730	5680	E 1930	<22.2	<22.2	<22.2	3720	E 4850	E 5450	E 5540	E 5380	E 6310	<22.2	E 1720	E 2720	E 2130	E 668
LC-MS/MS pharmaceuticals	albuterol	prescription	β2-adrenergic receptor agonist for asthma treatment	6.7 - 134	E 166	<134	<6.7	21.9	<6.7	36.4	12.3	11.9	<6.7	<6.7	<6.7	<6.7	E 6.60	17.9	22.9	21.9	19.4	23.3	<6.7	<6.7	<6.7	<6.7	<6.7
LC-MS/MS pharmaceuticals	amitriptyline	prescription	antidepressant	37.0 - 740	<37.0	<740	<37.0	<37.0	E 77.7	E 53.4	<37.0	<37.0	<37.0	<37.0	<37.0	<37.0	<37.0	E 26.5	E 24.6	E 20.2	E 22.3	E 23.4	<37.0	<37.0	<37.0	<37.0	<37.0
LC-MS/MS pharmaceuticals	amphetamine	prescription	stimulant	8.1	E 1560	20400	<8.1	289	394	303	133	163	<8.1	<8.1	<8.1	<8.1	<8.1	258	312	217	289	309	<8.1	<8.1	<8.1	<8.1	<8.1
LC-MS/MS pharmaceuticals	atenolol	prescription	betablocker	16.3 - 400	<72.6	<400	<13.3	1430	3700	2040	1180	1050	148	62.3	E 6.27	30	309	1390	1780	1550	1410	1430	118	148	208	162	109
LC-MS/MS pharmaceuticals	atrazine	pesticide	herbicide	19.4 - 380	E 66.6	<380	E 141	E 11.2	<19.4	26.9	<19.4	<19.4	39.5	<19.4	21	<19.4	<19.4	9.35	9.08	16.3	24.1	11.2	50.1	39.5	42.9	29.9	31.9
LC-MS/MS pharmaceuticals	bupropion	prescription	antidepressant	17.8 - 360	<17.8	<360	<17.8	176	166	E 173	42.2	77.3	109	282	90.2	52.1	57.5	108	142	176	550	516	80.8	103	136	109	254
LC-MS/MS pharmaceuticals	caffeine	nonprescription	stimulant	90.7 - 1820	E 3430	<1820	631	E 55500	78100	69100	32400	71900	E 306	<90.7	<90.7	<90.7	<90.7	E 48600	E 77400	E 65900	E 55500	E 55500	E 207	E 306	E 663	E 706	E 99.7
LC-MS/MS pharmaceuticals	carbamazepine	prescription	antiseizure	11.0	E 143	345	E 48.9	163	209	213	97.8	237	156	204	301	95.6	115	177	163	148	146	193	122	190	201	139	156
LC-MS/MS pharmaceuticals	carisoprodol	prescription	muscle relaxant	20.0 - 37.9	E 1890	3060	E 527	24.4	263	36.8	E 5.73	<37.9	28.2	83.5	36.7	28.2	68.5	24.4	23.3	39.1	69.1	20.5	28.2	28	35.4	27.1	38.3
LC-MS/MS pharmaceuticals	chlorpheniramine	nonprescription	antihistamine	4.7 - 1080	<54.0	<1080	<4.7	E 10.5	18.2	E 29.8	E 6.30	12.7	<54.0	<54.0	<4.7	<4.7	<4.7	E 9.90	E 10.8	E 8.8	E 11.1	E 10.5	<54.0	<54.0	<54.0	<54.0	<54.0
LC-MS/MS pharmaceuticals	cimetidine	nonprescription	histamine H2-receptor antagonist that inhibits production of stomach acid	27.8 - 840	<80.0	<840	<80	E 185	E 320	E 109	E 153	E 179	<80.0	<42.0	<80.0	<27.8	<27.8	E 117	E 141	E 185	E 272	E 228	<80.0	<80.0	<80.0	<80.0	<80.0
LC-MS/MS pharmaceuticals	citalopram	prescription	antidepressant	6.6 - 132	<6.60	<132	<6.6	150	389	E 370	110	141	32	<6.6	<6.6	<6.6	110	150	182	136	147	154	<6.6	<6.6	48.1	15.7	<6.6
LC-MS/MS pharmaceuticals	codeine	prescription	opiate used as analgesic: antitussive: and antidiarrheal	88.3 - 1760	<88.3	<1760	<88.3	148	E 242	E 94.2	107	117	<88.0	<88.3	U-DLTD	<88.3	E 53.2	225	147	135	148	185	<88.3	<88.3	<88.3	<88.3	<88.3
LC-MS/MS pharmaceuticals	cotinine	nonprescription	nicotine metabolite	7.8 - 20.0	E 6590	34000	E 8.57	1550	4550	1980	1450	1050	14.3	<20.0	8.06	<7.8	33.8	1610	1660	1320	1330	1550	12.7	14.3	19.2	14.3	8.88
LC-MS/MS pharmaceuticals	desvenlafaxine	prescription	antidepressant	84.0 - 1680	E 277	<1680	E 137	765	2390	2000	360	509	375	<84.0	<84.0	<84.0	454	771	854	679	675	765	<84.0	<84.0	375	<84.0	<84.0
LC-MS/MS pharmaceuticals	dextromethorphan	nonprescription	cough suppressant	8.2 - 164	<23.3	<164	<8.2	84.7	85	86.3	40	39.8	26	<8.2	<8.2	<8.2	35.7	149	95.9	84.7	73.7	79.9	<8.2	<8.2	39.7	12.2	<8.2
LC-MS/MS pharmaceuticals	diazepam	prescription	benzodiazepine used to treat anxiety: insomnia: seizures	4.0 - 80.0	<4.0	<80	<4.0	<4.0	<4.0	14.6	<4.0	<4.0	<4.0	<4.0	12.9	<4.0	<4.0	<4.0	<4.0	<4.0	<4.0	<4.0	<4.0	<4.0	<4.0	<4.0	<4.0
LC-MS/MS pharmaceuticals	diltiazem	prescription	antihypertension	10.2 - 200	<10.2	<200	<10.2	148	281	378	91.5	87.6	21	<10.2	<10.2	<10.2	35.5	145	148	168	137	155	<10.2	<10.2	21	<10.2	<10.2
LC-MS/MS pharmaceuticals	diphenhydramine	nonprescription	antihistamine	5.8 - 380	<19.0	<380	<5.8	1410	1860	E 2520	1040	1020	40.5	<19.0	<5.8	<5.8	407	1420	1680	1410	1160	1360	<19.0	19.1	164	61.9	11.3
LC-MS/MS pharmaceuticals	erythromycin	prescription	antibiotic	53.1 - 1600	<80.0	<1600	<80.0	E 12.5	<80.0	E 20.1	<53.1	E 56.0	<80.0	<80.0	<80.0	<53.1	<53.1	<80.0	<80.0	<80.0	E 12.5	<80.0	<80.0	<80.0	<80.0	<80.0	<80.0
LC-MS/MS pharmaceuticals	famotidine	nonprescription	acid inhibitor used to treat ulcer and acid reflux disease	20.0 - 680	<34.0	<680	<80	168	E 294	E 147	E 117	E 193	<34.0	<34.0	<80.0	<20.0	<20.0	E 136	E 177	E 195	E 168	E 148	<34.0	<34.0	<34.0	<34.0	<34.0
LC-MS/MS pharmaceuticals	fenofibrate	prescription	fibrate drug used to reduce cholesterol levels	6.0 - 280	<200	<280	<6.0	19.1	<14.0	E 23.1	<14.0	E 29.8	<200	<14.0	<6.0	<10.0	<14.0	E 19.5	E 22.5	E 18.6	E 19.1	E 17.7	<200	<200	<200	<200	<200
LC-MS/MS pharmaceuticals	fexofenadine	nonprescription	antihistamine	19.9 - 1920	E 211	<1920	<19.9	1680	2890	3670	1230	1950	425.5	E 10.3	<19.9	<19.9	1270	1550	2390	1680	1650	1860	<96.0	254	783	597	210
LC-MS/MS pharmaceuticals	fluconazole	prescription	antifungal	30.0	E 532	1270	E 207	248	178	316	190	234	200	251	297	163	129	261	248	145	188	343	200	213	246	185	199
LC-MS/MS pharmaceuticals	fluoxetine	prescription	depression and anxiety disorders	27.0 - 540	<27.0	<540	<27.0	<27.0	E 54.3	E 48.7	<27.0	<80.0	<27.0	<27.0	<27.0	<27.0	<27.0	<27.0	<27.0	<27.0	<27.0	<27.0	<27.0	<27.0	<27.0	<27.0	<27.0
LC-MS/MS pharmaceuticals	glyburide	prescription	sulfonylurea antidiabetic drug	4.0 - 1160	<58.0	<1160	<4.0	5.9	14.2	6.19	E 1.43	<4.0	<58.0	<4.0	<4.0	<4.0	<4.0	E 5.90	E 8.30	E 6.70	E 4.00	E 5.40	<58.0	<58.0	<58.0	<58.0	<58.0
LC-MS/MS pharmaceuticals	hydrocodone	prescription	pain reliever	10.6 - 400	<10.0	<400	<10.6	36.3	E 65.7	71.9	49.3	<40.0	<10.6	<20.0	U-DLTD	<20.0	E 24.4	E 38.4	E 36.3	E 27.6	E 65.3	E 29.3	<10.6	<10.6	<10.6	<10.6	<10.6
LC-MS/MS pharmaceuticals	hydroxyzine	prescription	antihistamine	7.4 - 148	<7.40	<148	<7.4	37.9	22	8.19	16.9	19.2	<7.4	<7.4	<7.4	<7.4	<7.4	27.7	20.7	37.9	97.7	83.4	<7.4	<7.4	<7.4	<7.4	<7.4
LC-MS/MS pharmaceuticals	ketoconazole	nonprescription	antifungal	113 - 2260	<140	<2260	<113	E 21.65	<113	E 109	E 42.6	<113	<140	<113	<113	<113	<113	E 34.5	<140	E 13.3	E 7.60	E 30.0	<140	<140	<140	<140	<140
LC-MS/MS pharmaceuticals	lamivudine	prescription	reverse-transcriptase inhibitor used to treat Hepatitis-B	20.0 - 400	<144	<400	<20.0	566	<20.0	207	584	866	<20.0	<20.0	<20.0	<20.0	<20.0	E 534	E 598	E 519	E 610	<407	<20.0	<20.0	<20.0	<20.0	<20.0
LC-MS/MS pharmaceuticals	lidocaine	nonprescription	pain relief	8.0 - 38.0	E 19400	25400	E 605	530	1170	791	475	464	99.7	<38.0	<8.0	<15.2	372	570	634	530	490	394	<38.0	49.4	289	150	29.4
LC-MS/MS pharmaceuticals	meprobamate	prescription	antianxiety	12.0 - 1720	E 247	<1720	E 149	333	1110	427	93.9	130	243	222	277	158	113	370	333	368	239	265	236	243	279	210	255
LC-MS/MS pharmaceuticals	metaxalone	prescription	muscle relaxant	15.6 - 400	E 435	<400	E 199	30.4	E 187	E 63.5	<20.0	<20.0	54.8	<20.0	<15.6	<20.0	<20.0	27.1	88.9	40.1	16	30.4	24.5	60.9	84.8	54.8	27.7
LC-MS/MS pharmaceuticals	metformin	prescription	antidiabetic	20.0 - 3690	<3690	<400	<252	31800	E 39900	E 28400	E 7510	57100	E 762	<20.0	<180	<606	E 2580	E 31800	E 49700	E 41000	E 27600	E 30700	E 587	E 757	E 2130	E 1220	E 762
LC-MS/MS pharmaceuticals	methadone	prescription	pain reliever	7.6 - 152	<7.60	<152	<7.6	39.1	24.4	23.2	20.5	22.1	8.895	<7.6	<7.6	<7.6	19	41.5	39.1	44.4	36.1	38.5	<7.6	E 4.85	18.3	12.9	4.89
LC-MS/MS pharmaceuticals	methocarbamol	prescription	muscle relaxant	8.7 - 220	E 427	<220	<8.7	1880	4940	E 3510	2040	1370	1130	1160	E 1020	368	1010	2050	2850	1830	1740	1880	518	1610	1690	1130	677
LC-MS/MS pharmaceuticals	methyl-1h-benzotriazole	industrial	corrosion inhibitor	80.0 - 1600	E 4110	<1600	E 1090	454	733	691	749	5750	729	965	718	783	2650	340	402	468	786	454	696	879	962	633	729
LC-MS/MS pharmaceuticals	metoprolol	prescription	antihypertension	27.5 - 540	E 118	<540	<27.5	237	984	552	185	152	120	450	134	110	106	237	274	236	227	259	107	131	156	116	120
LC-MS/MS pharmaceuticals	morphine	prescription	opiate used as analgesic	<20.0 - 1600	<80.0	<1600	<80.0	555	368	444	249	312	<20.0	<80.0	<80.0	<20.0	<20.0	676	555	512	615	533	<80.0	<80.0	<80.0	<80.0	<80.0
LC-MS/MS pharmaceuticals	nadolol	prescription	beta blocker used to reduce high blood pressure: migraine headaches: chest pain	20.0 - 400	<20.0	<400	<80.8	E 15.1	141	E 18.0	E 28.2	<80.8	<20.0	<20.0	<80.8	<80.8	<80.8	6.2	17.1	29.8	7.2	15.1	<20.0	<20.0	<20.0	<20.0	<20.0
LC-MS/MS pharmaceuticals	n-desmethyldiltiazem	prescription	diltiazem metabolite	12.4 - 1400	<70.0	<1400	<80.0	42.9	E 106	E 138	E 17.8	E 23.4	E 14.4	<70.0	<80.0	<12.4	E 17.0	E 42.9	E 48.1	E 44.9	E 37.9	39.1	<70.0	E 10.1	E 18.7	E 20.0	E 8.00
LC-MS/MS pharmaceuticals	nicotine	nonprescription	stimulant	57.8	<57.8	61400	<57.8	3280	6050	E 4960	3660	2590	<57.8	<57.8	<57.8	<57.8	<57.8	E 3280	E 3280	E 3200	E 3630	E 3440	<57.8	<57.8	<57.8	<57.8	<57.8
LC-MS/MS pharmaceuticals	norverapamil	prescription	metabolite of verapamil	8.6 - 400	<8.60	<400	<8.6	9.87	E 17.5	E 25.0	<8.6	E 13.3	<8.6	<20.0	<8.6	<8.6	<8.6	E 10.2	E 11.3	E 8.21	E 8.15	E 9.87	<8.6	<8.6	<8.6	<8.6	<8.6
LC-MS/MS pharmaceuticals	oxycodone	prescription	pain reliever	24.9 - 500	<24.9	<500	<24.9	77.2	168	E 157	46.1	44.7	<24.9	<24.9	U-DLTD	<24.9	30.9	77.6	74.9	77.2	58	78.4	<24.9	<24.9	<24.9	<24.9	<24.9
LC-MS/MS pharmaceuticals	penciclovir	prescription	antiviral for treatment of herpes	40.2 - 1600	<397	<1600	<40.2	153	<80.0	114	<40.2	247	<80.0	<80.0	<40.2	<40.2	<43.5	<80.0	<80.0	<118	E 153	<80.0	<80.0	<80.0	<80.0	<80.0	<80.0
LC-MS/MS pharmaceuticals	pentoxifylline	prescription	pain reliever	9.4 - 1200	E 148	1200	<9.4	25.2	<9.4	39.6	<9.4	<9.4	<9.4	<9.4	<9.4	<9.4	<9.4	26.6	10.7	38.3	21.5	25.2	<9.4	<9.4	<9.4	<9.4	<9.4
LC-MS/MS pharmaceuticals	phenytoin	prescription	antiseizure	188 - 4000	<268	<4000	E 170	84.35	<200	160	<188	<200	E 89.6	<200	148	<188	E 45.6	E 84.6	E 169	<188	E 84.1	E 68.9	E 89.6	E 99.0	E 109	E 61.2	E 84.0
LC-MS/MS pharmaceuticals	piperonyl butoxide	pesticide	synergist	3.1 - 400	E 14.1	<400	E 7.43	280	E 450	E 268	E 286	E 188	<20.0	<20.0	<4.0	<3.1	<20	E 139	E 226	E 280	E 312	E 501	<20.0	<20.0	<20.0	<20.0	<20.0
LC-MS/MS pharmaceuticals	propranolol	prescription	antihypertension	26.1 - 520	<26.3	<520	<26.1	53.2	151	156	42.6	<42.8	<26.1	<26.1	<26.1	<26.1	29.4	53.2	60.2	50.2	51.4	61.8	<26.1	<26.1	<26.1	<26.1	<26.1
LC-MS/MS pharmaceuticals	pseudoephedrine + ephedrine	nonprescription	antihistamine	11.1 - 209	<209	1720	153	1330	1300	1810	825	1120	<11.1	<11.1	U-DLTD	<11.1	23.5	1330	1520	1230	998	1670	<11.1	<11.1	<11.1	<11.1	<11.1
LC-MS/MS pharmaceuticals	quinine	prescription	antimalarial: bitter flavoring agent: mild antipyretic: and analgesic	80.0 - 1600	<80.0	<1600	<80.0	E 16.8	<80.0	E 76.9	E 21.0	E 37.6	<80.0	<80.0	<80.0	<80.0	<80.0	E 17.9	E 16.8	E 15.4	E 14.4	E 17.6	<80.0	<80.0	<80.0	<80.0	<80.0
LC-MS/MS pharmaceuticals	ranitidine	nonprescription	acid inhibitor used to treat ulcer and acid reflux disease	192	<192	X-DLTD	U-DLTD	542	U-DLTD	U-DLTD	E 434	E 797	<400	U-DLTD	U-DLTD	<192	<192	E 467	203	E 1080	E 869	E 542	<192	<400	<400	<400	<400
LC-MS/MS pharmaceuticals	sertraline	prescription	depression and anxiety disorders	16.0	<16.0	<320	<16.0	<16.0	E 23.5	E 16.5	<16.0	<16.0	<16.0	<16.0	<16.0	<16.0	<16.0	<16.0	<16.0	<16.0	<16.0	<16.0	<16.0	<16.0	<16.0	<16.0	<16.0
LC-MS/MS pharmaceuticals	sitagliptin	prescription	preantidiabetic	97.3 - 1940	<200	<1940	<97.3	1280	1870	2070	652	1010	489	877	132	275	544	1280	1470	1300	1100	1210	387	980	814	480	489
LC-MS/MS pharmaceuticals	sulfamethoxazole	prescription	antibiotic	26.1 - 520	<26.1	<520	<26.1	2000	E 3270	4030	1290	813	E 156	<26.1	E 11.9	E 10.6	384	2000	E 2530	1790	1350	2320	<26.1	E 78.1	476	E 234	E 38.0
LC-MS/MS pharmaceuticals	temazepam	prescription	diazepam metabolit	18.4 - 1600	<311	<1600	<18.4	173	481	231	85.2	<95.1	149	335	179	97.2	89.3	150	238	197	173	150	150	149	166	147	140
LC-MS/MS pharmaceuticals	theophylline	prescription	antiasthma	69.6 - 1600	<106	<1600	<69.6	2570	3450	2470	1760	<2720	<80.0	<80.0	<41.5	<80.0	<80.0	E 2570	E 3130	E 2250	E 2100	E 2720	<80.0	<94.6	<160	<155	<80.0
LC-MS/MS pharmaceuticals	thiabendazole	prescription	antifungal	4.0	E 72.4	16400	E 121	21	179	31.4	E 26.8	E 22.3	15.8	85.2	17.6	E 14.1	E 17.0	17	20.8	22	26.2	21	15.1	19.3	20.6	13	15.8
LC-MS/MS pharmaceuticals	tramadol	prescription	pain reliever	15.1 - 400	E 479	<400	E 57.5	668	1240	908	505	477	115.8	<20.0	<15.1	<15.1	370	808	830	556	628	668	<15.1	63.6	324	168	62.1
LC-MS/MS pharmaceuticals	triamterene	prescription	antihypertension	5.2 - 104	E 29.7	<104	<5.2	62	249	E 189	75.2	56.6	20.3	<5.2	<5.2	<5.2	46.5	63.9	68.6	62	54.2	60.8	<5.2	16.2	33.9	24.4	13.2
LC-MS/MS pharmaceuticals	trimethoprim	prescription	antibiotic	19.9 - 400	<19.0	<400	<19.9	582	762	797	361	399	36	<19.9	<19.9	<19.9	119	568	787	582	443	653	<19.9	<19.9	36.4	<19.9	<19.9
LC-MS/MS pharmaceuticals	valacyclovir	prescription	antiviral for treatment of herpes	163 - 3260	<163	<3260	<163	224	<163	<163	<163	<163	<163	<163	<163	<163	<163	<163	E 224	<163	<163	<163	<163	<163	<163	<163	<163
LC-MS/MS pharmaceuticals	venlafaxine	prescription	antidepressant	5.2 - 104	E 175	<104	<7.9	233	635	554	110	172	44.55	<5.2	<4.5	<20.0	182	202	253	243	220	233	<5.2	22.2	125	65.9	23.2
LC-MS/MS pharmaceuticals	verapamil	prescription	treatment of hypertension: angina pectoris: cardiac arrhythmia	15.5 - 2800	<140	<2800	<15.5	34.6	52.3	E 90.8	23.2	E 32.4	<140	<140	<15.5	<15.5	E 11.6	E 34.6	E 40.6	E 38.4	E 33.9	E 30.0	<140	<140	<140	<140	<140
#Table SI-3. Concentrations of target-organic chemicals (in nanograms per liter) detected in landfill leachate, wastewater influent (-INF), and wastewater effluent (-EF) samples. Sorted alphabetically by analytical method then by parameter name.
#[*, Median concentration from five five WWTP A-INF or five WWTP A-EF samples collected from 10-19-2016 @ 15:00 to 10-20-2016 @ 12:45.]
#[ LC-MS/MS, liquid chromatography-tandem mass spectrometry; GC-MS/MS, gas chromatography-tandem mass spectrometry; PFAS, per-/poly-fluoroalkyl substance(s)]
#[X-DLTD, Failure based on associate quality-control information, data excluded from statistics, known cause.]
#[U-DLTD, Unable to determine because of matrix interference.]
E, estimated concentration with reduced precision and accuracy due to concentrations falling outside the calibration range.
V, concentration could potentially be influenced by blank contamination during collection and/or analysis of samples.

## Sheet: Tables SI-4_nohits
Analytical Method	Parameter Name	Reporting Level (ng/L)
GC-MS/MS hormones	17-alpha-estradiol	0.8
GC-MS/MS hormones	17-alpha-ethynylestradiol	0.8
GC-MS/MS hormones	epitestosterone	2
GC-MS/MS hormones	equilenin	21.7
GC-MS/MS hormones	equilin	16
GC-MS/MS hormones	mestranol	1.6
GC-MS/MS hormones	norethindrone	1.6
GC-MS/MS hormones	trans-diethylstilbestrol	1.3
LC-MS/MS PFAS	10:2 fluorotelomer mercaptoalkyl phosphate diester (10:2 FTMAP)	10
LC-MS/MS PFAS	1H,1H,2H,2H-perfluoro-1-decanesulfonate (8:2 FtS)	10
LC-MS/MS PFAS	1H,1H,2H,2H-perfluoro-1-dodecanesulfonate (10:2 FtS)	10
LC-MS/MS PFAS	1H,1H,2H,2H-perfluoro-1-hexanesulfonate (4:2 FtS)	10
LC-MS/MS PFAS	2-perfluorobutylethanoic acid (FBEA)	10
LC-MS/MS PFAS	3-Perfluorononyl propanoic acid (9:3) (FNPA)	10
LC-MS/MS PFAS	4:2 disubstituted polyfluoroalkyl phosphate (4:2 diPAP)	10
LC-MS/MS PFAS	4:2/6:2 disubstituted polyfluoroalkyl phosphate (4:2/6:2 diPAP)	10
LC-MS/MS PFAS	6:2 fluorotelomer mercaptoalkyl phosphate diester (6:2 FTMAP)	10
LC-MS/MS PFAS	6:2/8:2 fluorotelomer mercaptoalkyl phosphate diester (6:2/8:2 FTMAP)	10
LC-MS/MS PFAS	8:2 fluorotelomer mercaptoalkyl phosphate diester (8:2 FTMAP)	10
LC-MS/MS PFAS	8:2/10:2 fluorotelomer mercaptoalkyl phosphate diester (8:2/10:2 FTMAP)	10
LC-MS/MS PFAS	bis(perfluorobutyl) phosphinate (4:4 PFPi)	10
LC-MS/MS PFAS	bis(perfluorohexyl) phosphinate (6:6 PFPi)	10
LC-MS/MS PFAS	bis(perfluorooctyl) phosphinate (8:8 PFPi)	10
LC-MS/MS PFAS	ethyl perfluoroheptane sulfonamido acetic acid (EtFHpSAA)	10
LC-MS/MS PFAS	perfluoro n-heptadecanoic acid (PFHpDA)	10
LC-MS/MS PFAS	perfluoro n-hexadecanoic acid (PFHxDA)	10
LC-MS/MS PFAS	perfluoro n-octadecanoic acid (PFOcDA)	10
LC-MS/MS PFAS	perfluoro n-pentadecanoic acid (PFPeDA)	10
LC-MS/MS PFAS	perfluoro n-tetradecanoid (PFTeDA)	10
LC-MS/MS PFAS	perfluoro n-tridecanoic (PFTrDA)	10
LC-MS/MS PFAS	perfluoro-1-decanesulfonate (PFDS)	10
LC-MS/MS PFAS	perfluoro-1-ethane sulfonate (PFEtS)	10
LC-MS/MS PFAS	perfluoro-1-nonanesulfonate (PFNS)	10
LC-MS/MS PFAS	perfluoro-1-propanesulfonate (PFPrS)	10
LC-MS/MS PFAS	perfluorobutane sulfonamido acetic acid (FBSAA)	10
LC-MS/MS PFAS	perfluorobutyl perfluorohexyl phosphinate (4:6 PFPi)	10
LC-MS/MS PFAS	perfluoroheptane sulfonamido acetic acid (FHpSAA)	10
LC-MS/MS PFAS	perfluorohexane sulfonamido acetic acid (FHxSAA)	10
LC-MS/MS PFAS	perfluorohexylperfluorooctyl phosphinate (6:8 PFPi)	10
LC-MS/MS PFAS	perfluoro-n-butanoic acid (PFBA)	10
LC-MS/MS PFAS	perfluorooctane sulfonamide acetic acid (FOSAA)	10
LC-MS/MS PFAS	perfluoropentane sulfonamido acetic acid (FPeSAA)	10
LC-MS/MS pharmaceuticals	alprazolam	21
LC-MS/MS pharmaceuticals	antipyrine	227
LC-MS/MS pharmaceuticals	benztropine	44
LC-MS/MS pharmaceuticals	betamethasone	114
LC-MS/MS pharmaceuticals	clonidine	61
LC-MS/MS pharmaceuticals	dehydronifedipine	30
LC-MS/MS pharmaceuticals	duloxetine	37
LC-MS/MS pharmaceuticals	ezetimibe	205
LC-MS/MS pharmaceuticals	fadrozole	13
LC-MS/MS pharmaceuticals	fluticasone propionate	200
LC-MS/MS pharmaceuticals	fluvoxamine	200
LC-MS/MS pharmaceuticals	glipizide	80
LC-MS/MS pharmaceuticals	hydrocortisone	200
LC-MS/MS pharmaceuticals	iminostilbene	145
LC-MS/MS pharmaceuticals	loperamide	80
LC-MS/MS pharmaceuticals	loratadine	7
LC-MS/MS pharmaceuticals	lorazepam	3720
LC-MS/MS pharmaceuticals	methotrexate	52
LC-MS/MS pharmaceuticals	nevirapine	290
LC-MS/MS pharmaceuticals	nizatidine	140
LC-MS/MS pharmaceuticals	nordiazepam	20
LC-MS/MS pharmaceuticals	norethindrone	20
LC-MS/MS pharmaceuticals	norfluoxetine	80
LC-MS/MS pharmaceuticals	norsertraline	80
LC-MS/MS pharmaceuticals	omeprazole + esomprazole	16
LC-MS/MS pharmaceuticals	oseltamivir	22.2
LC-MS/MS pharmaceuticals	oxazepam	226
LC-MS/MS pharmaceuticals	paroxetine	264
LC-MS/MS pharmaceuticals	phenazopyridine	80
LC-MS/MS pharmaceuticals	phendimetrazine	307
LC-MS/MS pharmaceuticals	prednisolone	1680
LC-MS/MS pharmaceuticals	prednisone	168
LC-MS/MS pharmaceuticals	promethazine	200
LC-MS/MS pharmaceuticals	propoxyphene	17
LC-MS/MS pharmaceuticals	raloxifene	200
LC-MS/MS pharmaceuticals	sulfadimethoxine	65
LC-MS/MS pharmaceuticals	sulfamethizole	117
LC-MS/MS pharmaceuticals	tamoxifen	270
LC-MS/MS pharmaceuticals	tiotropium	200
LC-MS/MS pharmaceuticals	warfarin	120
#Table SI-4. Target-organic chemicals not detected in landfill leachate, wastewater influent, and wastewater effluent samples. Sorted alphabetically by analytical method then by parameter name.
#[ LC-MS/MS, liquid chromatography-tandem mass spectrometry: GC-MS/MS, gas chromatography-tandem mass spectrometry; PFAS, per-/poly-fluoroalkyl substance(s)]

## Sheet: Table SI-5_PFAS_Pro%_Conc_Loads
Analytical Method	Parameter Name	Percent of Total Concentration in LeachateA	Percent of Total Concentration in InfluentB	Percent of Total Concentration in EffluentC	Percent of Total Load in LeachateD	Percent of Total Load in InfluentE	Percent of Total Load in EffluentF	Percent of Total Load from Leachate to InfluentG
GC-MS/MS hormones	11-ketotestosterone	*	100	*	*	100	*	*
GC-MS/MS hormones	17-beta-estradiol	*	100	*	*	100	*	*
GC-MS/MS hormones	3-beta-coprostanol	10.5708	89.3453	0.0838774	*	99.839	0.133919	0.0271043
GC-MS/MS hormones	4,4'-bisphenol f	89.7268	10.2732	*	1.78328	98.2167	*	1.84923
GC-MS/MS hormones	4-androstene-3,17-dione	24.5545	74.7579	0.687561	*	98.5423	1.4223	0.0359721
GC-MS/MS hormones	bisphenol a	93.3469	6.65309	*	2.94106	96.9728	0.0861314	3.12773
GC-MS/MS hormones	cholesterol	7.0872	92.8292	0.0835941	*	99.7626	0.215712	0.0217936
GC-MS/MS hormones	cis-androsterone	1.00643	98.9936	*	*	99.9996	*	*
GC-MS/MS hormones	dihydrotestosterone	*	100	*	*	100	*	*
GC-MS/MS hormones	estriol	2.46575	97.5342	*	*	99.9953	*	*
GC-MS/MS hormones	estrone	8.8763	89.6758	1.44791	*	96.0754	3.90189	0.0236109
GC-MS/MS hormones	testosterone	*	100	*	*	100	*	*
LC-MS/MS PFAS	10:2 disubstituted polyfluoroalkyl phosphate (10:2 diPAP)	*	100	*	*	100	*	*
LC-MS/MS PFAS	1H,1H,2H,2H-perfluoro-1-octanesulfonate (6:2 FtS)	66.3204	32.8805	0.799041	0.779929	96.6506	2.56946	0.813522
LC-MS/MS PFAS	2H-perfluoro-2-decenoic acid (FOUEA)	100	*	*	100	*	*	*
LC-MS/MS PFAS	2H-perfluoro-2-dodecenoic acid (FDUEA)	100	*	*	100	*	*	*
LC-MS/MS PFAS	2H-perfluoro-2-hexenoic acid (FBUEA)	*	100	*	*	100	*	*
LC-MS/MS PFAS	2H-perfluoro-2-octenoic acid (FHUEA)	81.7204	18.2796	*	0.422069	99.5779	*	0.425662
LC-MS/MS PFAS	2-perfluorodecylethanoic acid (FDEA)	100	*	*	100	*	*	*
LC-MS/MS PFAS	2-perfluorohexylethanoic acid (FHEA)	100	*	*	100	*	*	*
LC-MS/MS PFAS	2-perfluorooctylethanoic acid (FOEA)	100	*	*	100	*	*	*
LC-MS/MS PFAS	3-Perfluoroheptyl propanoic acid (7:3) (FHpPA)	95.1904	4.80962	*	10.0222	89.9778	*	12.5347
LC-MS/MS PFAS	3-Perfluoropentyl propanoic acid (5:3) (FPePA)	97.1093	2.8907	*	33.943	66.057	*	100
LC-MS/MS PFAS	3-Perfluoropropyl propanoic acid (3:3) (FPrPA)	100	*	*	100	*	*	*
LC-MS/MS PFAS	6:2 disubstituted polyfluoroalkyl phosphate (6:2 diPAP)	11.8519	88.1481	*	*	99.9663	*	*
LC-MS/MS PFAS	6:2/8:2 disubstituted polyfluoroalkyl phosphate (6:2/8:2 diPAP)	23.3333	76.6667	*	0.0725735	99.9274	*	0.072679
LC-MS/MS PFAS	8:2 disubstituted polyfluoroalkyl phosphate (8:2 diPAP)	21.7687	61.9048	16.3265	0.0516347	59.1026	40.8458	0.0874409
LC-MS/MS PFAS	8:2/10:2 disubstituted polyfluoroalkyl phosphate (8:2/10:2 diPAP)	20.2381	64.2857	15.4762	0.0501089	59.5339	40.416	0.0842396
LC-MS/MS PFAS	ethyl perfluorobutane sulfonamido acetic acid (EtFBSAA)	100	*	*	100	*	*	*
LC-MS/MS PFAS	ethyl perfluorohexane sulfonamido acetic acid (EtFHxSAA)	100	*	*	100	*	*	*
LC-MS/MS PFAS	ethyl perfluorooctane sulfonamide acetic acid (EtFOSAA	94.2549	5.74506	*	32.2226	67.7774	*	90.6277
LC-MS/MS PFAS	ethyl perfluoropentane sulfonamido acetic acid (EtFPeSAA)	100	*	*	100	*	*	*
LC-MS/MS PFAS	methyl perfluorobutane sulfonamido acetic acid (MeFBSAA)	92.4721	6.05521	1.4727	9.92259	54.0753	36.0021	22.4733
LC-MS/MS PFAS	methyl perfluoroheptane sulfonamido acetic acid (MeFHpSAA)	100	*	*	100	*	*	*
LC-MS/MS PFAS	methyl perfluorohexane sulfonamido acetic acid (MeFHxSAA)	91.6905	8.30946	*	58.0631	41.9369	*	100
LC-MS/MS PFAS	methyl perfluorooctane sulfonamide acetic acid (MeFOSAA)	100	*	*	100	*	*	*
LC-MS/MS PFAS	methyl perfluoropentane sulfonamido acetic acid (MeFPeSAA)	99.4736	0.526431	*	68.6549	31.3451	*	100
LC-MS/MS PFAS	n-ethyl perfluorooctanesulfonamidoethanol-based phosphate diester (SAmPAP)	100	*	*	100	*	*	*
LC-MS/MS PFAS	perfluoro-1-butanesulfonate (PFBS)	94.9683	2.74908	2.28257	41.4954	25.8176	32.6871	100
LC-MS/MS PFAS	perfluoro-1-heptanesulfonate (PFHpS)	100	*	*	100	*	*	*
LC-MS/MS PFAS	perfluoro-1-hexanesulfonate (PFHxS)	96.19	2.79462	1.01543	38.9637	39.6466	21.3897	100
LC-MS/MS PFAS	perfluoro-1-octanesulfonate (PFOS)	95.9964	4.00364	*	65.2615	34.7385	*	100
LC-MS/MS PFAS	perfluoro-1-pentanesulfonate (PFPeS)	100	*	*	100	*	*	*
LC-MS/MS PFAS	perfluorodecanoic acid (PFDA)	95.5121	2.07135	2.41657	33.8356	8.60873	57.5557	*
LC-MS/MS PFAS	perfluorododecanoic acid (PFDoA)	100	*	*	100	*	*	*
LC-MS/MS PFAS	perfluoroheptanoic acid (PFHpA)	93.053	4.25124	2.6958	21.4777	41.3551	37.1671	100
LC-MS/MS PFAS	perfluorohexanoic acid (PFHxA)	93.6509	3.80711	2.54195	21.0955	38.1634	40.7411	100
LC-MS/MS PFAS	perfluorononanoic acid (PFNA)	100	*	*	100	*	*	*
LC-MS/MS PFAS	perfluorooctanoic acid (PFOA)	68.0804	18.3594	13.5603	2.99383	50.9893	46.0169	6.23775
LC-MS/MS PFAS	perfluoropentanoic acid (PFPeA)	95.2781	*	4.72187	22.1568	*	77.8432	*
LC-MS/MS PFAS	perfluoroundecanoic acid (PFUdA)	*	100	*	*	100	*	*
LC-MS/MS pharmaceuticals	1,7-dimethylxanthine	3.94298	93.5563	2.50074	*	95.4423	4.55093	0.00712858
LC-MS/MS pharmaceuticals	10-hydroxy-amitriptyline	*	100	*	*	87.6761	12.3239	*
LC-MS/MS pharmaceuticals	abacavir	*	100	*	*	98.0277	1.97227	*
LC-MS/MS pharmaceuticals	acetaminophen	11.139	88.861	*	*	99.9805	*	0.0195158
LC-MS/MS pharmaceuticals	acyclovir	*	94.2001	5.79994	*	80.8788	19.1212	*
LC-MS/MS pharmaceuticals	albuterol	73.8434	26.1566	*	0.471187	84.1105	15.4183	0.563356
LC-MS/MS pharmaceuticals	amitriptyline	*	100	*	*	91.8742	8.12576	*
LC-MS/MS pharmaceuticals	amphetamine	95.8533	4.14666	*	1.68578	98.3142	*	1.7446
LC-MS/MS pharmaceuticals	atenolol	*	96.9965	3.00353	*	93.1123	6.88773	*
LC-MS/MS pharmaceuticals	atrazine	65.5096	14.8627	19.6276	4.3426	26.7328	68.9246	19.3952
LC-MS/MS pharmaceuticals	bupropion	*	53.1957	46.8043	*	60.6193	39.3807	*
LC-MS/MS pharmaceuticals	caffeine	1.91155	97.8604	0.228058	*	99.5687	0.409726	0.0216538
LC-MS/MS pharmaceuticals	carbamazepine	29.5829	31.8199	38.5972	0.251603	45.3705	54.3779	0.557645
LC-MS/MS pharmaceuticals	carisoprodol	91.5917	5.91826	2.49005	10.8762	54.5316	34.5923	24.9137
LC-MS/MS pharmaceuticals	chlorpheniramine	*	100	*	*	100	*	*
LC-MS/MS pharmaceuticals	cimetidine	*	100	*	*	98.1054	1.89462	*
LC-MS/MS pharmaceuticals	citalopram	*	98.7807	1.21926	*	95.9934	4.00661	*
LC-MS/MS pharmaceuticals	codeine	*	94.7131	5.28686	*	87.2983	12.7017	*
LC-MS/MS pharmaceuticals	cotinine	83.7457	16.2031	0.0511775	0.653971	98.594	0.752028	0.667726
LC-MS/MS pharmaceuticals	desvenlafaxine	7.50238	91.8226	0.675033	0.239556	96.8365	2.92395	0.247995
LC-MS/MS pharmaceuticals	dextromethorphan	*	96.1243	3.87567	*	91.3883	8.61172	*
LC-MS/MS pharmaceuticals	diazepam	*	53.0909	46.9091	*	42.3916	57.6084	*
LC-MS/MS pharmaceuticals	diltiazem	*	98.6598	1.34021	*	95.5873	4.41265	*
LC-MS/MS pharmaceuticals	diphenhydramine	*	98.9191	1.08086	*	97.0155	2.98447	*
LC-MS/MS pharmaceuticals	erythromycin	*	100	*	*	100	*	*
LC-MS/MS pharmaceuticals	famotidine	*	100	*	*	100	*	*
LC-MS/MS pharmaceuticals	fenofibrate	*	100	*	*	100	*	*
LC-MS/MS pharmaceuticals	fexofenadine	2.34724	91.4977	6.1551	*	82.3727	17.6208	0.00786858
LC-MS/MS pharmaceuticals	fluconazole	57.4246	20.3516	22.2238	0.824048	51.8138	47.3621	1.61611
LC-MS/MS pharmaceuticals	fluoxetine	*	100	*	*	88.7087	11.2913	*
LC-MS/MS pharmaceuticals	glyburide	*	100	*	*	70.5903	29.4097	*
LC-MS/MS pharmaceuticals	hydrocodone	*	100	*	*	100	*	*
LC-MS/MS pharmaceuticals	hydroxyzine	*	100	*	*	95.0996	4.90041	*
LC-MS/MS pharmaceuticals	ketoconazole	*	100	*	*	100	*	*
LC-MS/MS pharmaceuticals	lamivudine	*	100	*	*	100	*	*
LC-MS/MS pharmaceuticals	lidocaine	94.629	5.1613	0.209745	4.15099	84.3712	11.4778	5.17449
LC-MS/MS pharmaceuticals	loperamide	*	100	*	*	100	*	*
LC-MS/MS pharmaceuticals	loratadine	*	61.0711	38.9289	*	56.5518	43.4482	*
LC-MS/MS pharmaceuticals	meprobamate	13.2886	61.6107	25.1007	0.400865	61.4814	38.1178	0.656289
LC-MS/MS pharmaceuticals	metaxalone	62.0443	30.8264	7.12923	3.47629	49.0977	47.426	7.61985
LC-MS/MS pharmaceuticals	metformin	*	99.0457	0.954257	*	98.1535	1.84647	*
LC-MS/MS pharmaceuticals	methadone	*	87.3839	12.6161	*	78.7055	21.2945	*
LC-MS/MS pharmaceuticals	methocarbamol	3.0045	72.0166	24.9789	*	67.0877	32.9029	0.0140908
LC-MS/MS pharmaceuticals	methyl-1h-benzotriazole	54.3251	19.6929	25.982	1.65414	38.836	59.5099	4.4488
LC-MS/MS pharmaceuticals	metoprolol	4.50984	68.4502	27.0399	*	70.0984	29.8829	0.0266989
LC-MS/MS pharmaceuticals	morphine	*	99.3189	0.681137	*	98.6683	1.3317	*
LC-MS/MS pharmaceuticals	nadolol	*	100	*	*	100	*	*
LC-MS/MS pharmaceuticals	n-desmethyldiltiazem	*	95.2771	4.72286	*	84.4556	15.5444	*
LC-MS/MS pharmaceuticals	nicotine	81.1633	18.8367	*	0.279586	99.7204	*	0.281158
LC-MS/MS pharmaceuticals	nordiazepam	*	100	*	*	67.1649	32.8351	*
LC-MS/MS pharmaceuticals	norfluoxetine	*	100	*	*	100	*	*
LC-MS/MS pharmaceuticals	norverapamil	*	88.2109	11.7891	*	85.8085	14.1915	*
LC-MS/MS pharmaceuticals	omeprazole + esomprazole	*	100	*	*	100	*	*
LC-MS/MS pharmaceuticals	oxycodone	*	97.6818	2.31821	*	92.642	7.35799	*
LC-MS/MS pharmaceuticals	penciclovir	*	100	*	*	100	*	*
LC-MS/MS pharmaceuticals	pentoxifylline	94.6643	4.88069	0.455063	1.04157	87.163	11.7954	1.20942
LC-MS/MS pharmaceuticals	phenytoin	26.4715	38.01	35.5185	1.52004	47.7869	50.693	3.28538
LC-MS/MS pharmaceuticals	piperonyl butoxide	2.15833	97.3404	0.501238	0.0519259	98.3711	1.57698	0.0528136
LC-MS/MS pharmaceuticals	propranolol	*	97.3698	2.63017	*	90.523	9.477	*
LC-MS/MS pharmaceuticals	pseudoephedrine + ephedrine	29.437	70.4884	0.0745747	0.197381	99.5622	0.240416	0.198643
LC-MS/MS pharmaceuticals	quinine	*	100	*	*	100	*	*
LC-MS/MS pharmaceuticals	raloxifene	*	100	*	*	100	*	*
LC-MS/MS pharmaceuticals	ranitidine	*	100	*	*	100	*	*
LC-MS/MS pharmaceuticals	sertraline	*	100	*	*	100	*	*
LC-MS/MS pharmaceuticals	sitagliptin	*	76.2785	23.7215	*	75.8908	24.1092	*
LC-MS/MS pharmaceuticals	sulfamethoxazole	*	97.349	2.65096	*	92.1696	7.83041	*
LC-MS/MS pharmaceuticals	temazepam	*	58.404	41.596	*	57.1423	42.8577	*
LC-MS/MS pharmaceuticals	theophylline	*	100	*	*	100	*	*
LC-MS/MS pharmaceuticals	thiabendazole	97.8924	1.38343	0.724161	8.25875	50.8601	40.8812	19.3861
LC-MS/MS pharmaceuticals	tramadol	14.8924	79.8612	5.24636	0.128572	84.9157	14.9557	0.151641
LC-MS/MS pharmaceuticals	triamterene	5.36149	89.5568	5.08169	*	80.55	19.4306	0.0241357
LC-MS/MS pharmaceuticals	trimethoprim	*	99.3095	0.69054	*	98.0578	1.94218	*
LC-MS/MS pharmaceuticals	venlafaxine	10.3492	84.006	5.64476	*	79.5507	20.4138	0.0446265
LC-MS/MS pharmaceuticals	verapamil	*	95.3507	4.64933	*	86.5423	13.4577	*
#Table SI-5. Percent of total concentration and total load for chemicals detected in at least one sample matrix for paired samples of leachate, wastewater influent, wastewater effluent, and percent of total load contribution from leachate to paired wastewater influent samples. Sorted alphabetically by analytical method then by parameter name.
#[ LC-MS/MS, liquid chromatography-tandem mass spectrometry; GC-MS/MS, gas chromatography-tandem mass spectrometry; PFAS, per-/poly-fluoroalkyl substance(s)]
#[*, not available because chemical not detected in the primary sample matrix]
#[ A, % leachate concentration (LC) = ∑ LC / ( ∑ LC + ∑ influent concentration (IC) + ∑ effluent concentration (EC) ) x 100 ]
#[ B, % influent concentration (IC) = ∑ IC / ( ∑ LC + ∑ IC + ∑ EC ) x 100 ]
#[ C, % effluent concentration (EC) = ∑ EC / ( ∑ LC + ∑ IC + ∑ EC ) x 100 ]
#[ D, % leachate load (LL) = ∑ LL / ( ∑ LL + ∑ influent load (IL) + ∑ effluent (EL) ) x 100 ]
#[ E, % influent load (IL) = ∑ IL / ( ∑ LL + ∑ IL + ∑ EL ) x 100 ]
#[ F, % effluent load (EL) = ∑ EL / ( ∑ LL + ∑ IL + ∑ EL ) x 100 ]
#[ G, % leachate load contribution (LLC) to influent = ∑ LL / ( ∑ IL - ∑ LL ) x 100 ]

## Sheet: Table SI-6_loads
Analytical Method	Chemical Class	Parameter Name	Landfill A 10-19-2016 16:20	Landfill B 09-15-2016 10:45	Landfill C 07-30-2016 14:20	WWTP A-INF 10-20-2016*	WWTP B-INF 09-15-2016 13:05	WWTP C-INF 07-30-2016 04:55	WWTP D-INF 07-10-2016 10:08	WWTP E-INF 07-08-2016 10:47	WWTP A-EF 10-20-2016*	WWTP B-EF 09-15-2016 13:10	WWTP C-EF 07-30-2016 13:07	WWTP D-EF 07-10-2016 10:47	WWTP E-EF 07-08-2016 08:59
GC-MS/MS hormones	hormone	11-ketotestosterone	nc	nc	nc	2.38326	0.248912	nc	0.5166	8.9251	nc	nc	nc	nc	nc
GC-MS/MS hormones	hormone	17-beta-estradiol	nc	nc	nc	1.01706	0.098638	0.27852	0.2919	1.5049	nc	nc	nc	nc	nc
GC-MS/MS hormones	plant animal sterol	3-beta-coprostanol	12.6544	0.526309	nc	36900	4890	6960	25800	195000	58.2912	3.27028	3.8016	9.282	173.585
GC-MS/MS hormones	household	4,4'-bisphenol f	0.075495	0.0206241	nc	2.7324	0.35086	2.31	0.924	5.513	nc	nc	nc	nc	nc
GC-MS/MS hormones	hormone	4-androstene-3,17-dione	0.0041702	0.00130571	nc	12.7512	1.27104	1.2276	2.142	59.6	0.22011	nc	nc	nc	nc
GC-MS/MS hormones	industrial	bisphenol a	8.3404	8.31404	0.96712	90.321	124.456	333.96	5.418	92.082	nc	nc	nc	nc	nc
GC-MS/MS hormones	plant animal sterol	cholesterol	9.4189	0.0525182	2.772	44000	3380	8700	18600	167000	121.44	nc	nc	nc	151.98
GC-MS/MS hormones	hormone	cis-androsterone	nc	0.004186	nc	1050	26.0828	105.204	123.9	780.76	nc	nc	nc	nc	nc
GC-MS/MS hormones	hormone	dihydrotestosterone	nc	nc	nc	11.6886	1.13864	2.4024	2.94	45.743	nc	nc	nc	nc	nc
GC-MS/MS hormones	hormone	epitestosterone	nc	nc	nc	2.277	nc	nc	nc	nc	nc	nc	nc	nc	nc
GC-MS/MS hormones	hormone	estriol	0.00097065	nc	nc	18.8232	0.75468	2.7456	4.284	26.969	nc	nc	nc	nc	nc
GC-MS/MS hormones	hormone	estrone	0.00101379	nc	nc	2.99805	0.341592	0.6006	0.8778	7.7629	0.2277	nc	nc	nc	1.8178
GC-MS/MS hormones	hormone	progesterone	nc	nc	nc	nc	nc	nc	nc	7.7629	nc	nc	nc	nc	nc
GC-MS/MS hormones	hormone	testosterone	nc	nc	nc	3.68115	nc	nc	0.6405	10.5939	nc	nc	nc	nc	nc
LC-MS/MS PFAS	PFAS	10:2 disubstituted polyfluoroalkyl phosphate (10:2 diPAP)	nc	nc	nc	nc	0.07944	0.1848	nc	nc	nc	nc	nc	nc	nc
LC-MS/MS PFAS	PFAS	1H,1H,2H,2H-perfluoro-1-octanesulfonate (6:2 FtS)	0.08628	0.003542	0.3696	56.166	0.1655	0.7656	nc	nc	1.518	nc	nc	0.1638	nc
LC-MS/MS PFAS	PFAS	2H-perfluoro-2-decenoic acid (FOUEA)	0.0060396	nc	nc	nc	nc	nc	nc	nc	nc	nc	nc	nc	nc
LC-MS/MS PFAS	PFAS	2H-perfluoro-2-dodecenoic acid (FDUEA)	0.0007909	nc	nc	nc	nc	nc	nc	nc	nc	nc	nc	nc	1.2665
LC-MS/MS PFAS	PFAS	2H-perfluoro-2-hexenoic acid (FBUEA)	nc	nc	nc	nc	0.3641	nc	nc	nc	nc	nc	nc	nc	nc
LC-MS/MS PFAS	PFAS	2H-perfluoro-2-octenoic acid (FHUEA)	0.0054644	nc	nc	1.2903	nc	nc	nc	nc	nc	nc	nc	nc	nc
LC-MS/MS PFAS	PFAS	2-perfluorodecylethanoic acid (FDEA)	0.0012942	nc	nc	nc	nc	nc	nc	nc	nc	nc	nc	nc	nc
LC-MS/MS PFAS	PFAS	2-perfluorohexylethanoic acid (FHEA)	0.17256	nc	nc	nc	nc	nc	nc	nc	nc	nc	nc	nc	nc
LC-MS/MS PFAS	PFAS	2-perfluorooctylethanoic acid (FOEA)	0.069024	0.00966	nc	nc	nc	nc	nc	nc	nc	nc	nc	nc	nc
LC-MS/MS PFAS	PFAS	3-Perfluoroheptyl propanoic acid (7:3) (FHpPA)	0.025884	0.009499	nc	nc	0.31776	nc	nc	nc	nc	nc	nc	nc	nc
LC-MS/MS PFAS	PFAS	3-Perfluoropentyl propanoic acid (5:3) (FPePA)	0.20132	0.07406	1.848	2.277	1.1254	0.7392	nc	nc	nc	nc	nc	nc	nc
LC-MS/MS PFAS	PFAS	3-Perfluoropropyl propanoic acid (3:3) (FPrPA)	0.0053925	nc	nc	nc	nc	nc	nc	nc	nc	nc	nc	nc	nc
LC-MS/MS PFAS	PFAS	6:2 disubstituted polyfluoroalkyl phosphate (6:2 diPAP)	nc	nc	nc	5.9961	0.41706	nc	nc	nc	nc	nc	nc	nc	nc
LC-MS/MS PFAS	PFAS	6:2/8:2 disubstituted polyfluoroalkyl phosphate (6:2/8:2 diPAP)	0.0010066	nc	nc	1.0626	0.0993	0.2244	nc	2.235	nc	nc	nc	nc	nc
LC-MS/MS PFAS	PFAS	8:2 disubstituted polyfluoroalkyl phosphate (8:2 diPAP)	0.0023008	nc	nc	1.9734	0.1986	0.462	0.462	nc	1.8216	nc	nc	nc	nc
LC-MS/MS PFAS	PFAS	8:2/10:2 disubstituted polyfluoroalkyl phosphate (8:2/10:2 diPAP)	0.0012223	nc	nc	1.0626	0.13902	0.2508	nc	1.788	0.9867	nc	nc	nc	nc
LC-MS/MS PFAS	PFAS	Ethyl perfluorobutane sulfonamido acetic acid (EtFBSAA)	0.01438	nc	0.14938	nc	nc	nc	nc	nc	nc	nc	nc	nc	nc
LC-MS/MS PFAS	PFAS	Ethyl perfluorohexane sulfonamido acetic acid (EtFHxSAA)	0.0052487	nc	nc	nc	nc	nc	nc	nc	nc	nc	nc	nc	nc
LC-MS/MS PFAS	PFAS	Ethyl perfluorooctane sulfonamide acetic acid (EtFOSAA	0.016537	0.010465	0.2618	nc	0.23832	0.3696	nc	nc	nc	nc	nc	nc	nc
LC-MS/MS PFAS	PFAS	Ethyl perfluoropentane sulfonamido acetic acid (EtFPeSAA)	0.008628	0.014973	0.11088	nc	nc	nc	nc	nc	nc	nc	nc	nc	nc
LC-MS/MS PFAS	PFAS	Methyl perfluorobutane sulfonamido acetic acid (MeFBSAA)	0.17256	0.05957	1.001	3.7191	2.1846	0.8316	nc	nc	4.1745	0.35086	nc	1.302	7.45
LC-MS/MS PFAS	PFAS	Methyl perfluoroheptane sulfonamido acetic acid (MeFHpSAA)	0.0012223	0.0014651	nc	nc	nc	nc	nc	nc	nc	nc	nc	nc	nc
LC-MS/MS PFAS	PFAS	Methyl perfluorohexane sulfonamido acetic acid (MeFHxSAA)	0.022289	nc	0.5082	nc	0.38396	nc	nc	nc	nc	nc	nc	nc	nc
LC-MS/MS PFAS	PFAS	Methyl perfluorooctane sulfonamide acetic acid (MeFOSAA)	0.016537	0.014812	0.2156	nc	nc	nc	nc	nc	nc	nc	nc	nc	nc
LC-MS/MS PFAS	PFAS	Methyl perfluoropentane sulfonamido acetic acid (MeFPeSAA)	0.048892	0.12236	1.2166	nc	nc	0.6336	nc	nc	nc	nc	nc	nc	nc
LC-MS/MS PFAS	PFAS	N-ethyl perfluorooctanesulfonamidoethanol-based phosphate diester (SAmPAP)	0.0039545	nc	nc	nc	nc	nc	nc	nc	nc	nc	nc	nc	nc
LC-MS/MS PFAS	PFAS	Perfluoro-1-butanesulfonate (PFBS)	0.11504	0.03059	3.388	0.9867	0.7944	0.4224	nc	nc	1.5939	0.33762	0.7128	0.1974	1.4304
LC-MS/MS PFAS	PFAS	Perfluoro-1-heptanesulfonate (PFHpS)	nc	nc	0.03388	nc	nc	nc	nc	nc	nc	nc	nc	nc	nc
LC-MS/MS PFAS	PFAS	Perfluoro-1-hexanesulfonate (PFHxS)	0.051768	0.06601	1.848	0.8349	0.993	0.1848	nc	nc	0.759	0.35748	0.3828	nc	0.8642
LC-MS/MS PFAS	PFAS	Perfluoro-1-octanesulfonate (PFOS)	0.025884	0.014329	1.3244	nc	0.43692	0.2904	nc	nc	nc	nc	nc	nc	nc
LC-MS/MS PFAS	PFAS	Perfluoro-1-pentanesulfonate (PFPeS)	nc	0.0013202	0.11858	nc	nc	nc	nc	nc	nc	nc	nc	nc	nc
LC-MS/MS PFAS	PFAS	Perfluorodecanoic acid (PFDA)	0.007909	0.001932	0.924	nc	nc	0.2376	nc	nc	1.5939	nc	nc	nc	nc
LC-MS/MS PFAS	PFAS	Perfluorododecanoic acid (PFDoA)	nc	nc	0.09086	nc	nc	nc	nc	nc	nc	nc	nc	nc	nc
LC-MS/MS PFAS	PFAS	Perfluoroheptanoic acid (PFHpA)	0.10066	0.10465	3.542	4.0986	2.317	0.8184	1.512	nc	4.7817	1.324	0.5676	1.638	10.281
LC-MS/MS PFAS	PFAS	Perfluorohexanoic acid (PFHxA)	0.30198	0.13363	5.544	6.4515	3.1114	1.32	2.31	nc	9.108	1.7212	1.1088	4.62	11.324
LC-MS/MS PFAS	PFAS	Perfluorononanoic acid (PFNA)	0.008628	0.0010948	0.2002	nc	nc	nc	nc	nc	nc	nc	nc	nc	nc
LC-MS/MS PFAS	PFAS	Perfluorooctanoic acid (PFOA)	0.26603	0.07728	5.698	83.49	9.268	10.428	19.32	149	87.285	7.944	nc	25.2	178.8
LC-MS/MS PFAS	PFAS	Perfluoropentanoic acid (PFPeA)	nc	0.0322	2.156	nc	nc	nc	nc	nc	6.6792	nc	1.584	11.13	nc
LC-MS/MS PFAS	PFAS	Perfluoroundecanoic acid (PFUdA)	nc	nc	nc	4.7058	nc	nc	nc	nc	nc	nc	nc	nc	nc
LC-MS/MS pharmaceuticals	nonprescription	1,7-dimethylxanthine	nc	nc	nc	1710	112.54	90.024	216.3	nc	118.404	nc	nc	nc	nc
LC-MS/MS pharmaceuticals	prescription	10-hydroxy-amitriptyline	nc	nc	nc	2.33772	0.624266	0.6006	0.546	4.1422	nc	nc	nc	nc	nc
LC-MS/MS pharmaceuticals	prescription	abacavir	nc	nc	nc	4.60713	0.197938	0.594	1.3251	7.897	nc	nc	nc	nc	nc
LC-MS/MS pharmaceuticals	nonprescription	acetaminophen	0.95627	nc	nc	4140	nc	766.92	466.2	9070	nc	nc	nc	nc	nc
LC-MS/MS pharmaceuticals	prescription	acyclovir	nc	nc	nc	413.655	137.034	66.924	99.33	846.32	146.487	nc	nc	nc	554.28
LC-MS/MS pharmaceuticals	prescription	albuterol	0.0119354	nc	nc	1.66221	nc	0.48048	0.2583	1.7731	nc	nc	nc	nc	0.9834
LC-MS/MS pharmaceuticals	prescription	amitriptyline	nc	nc	nc	nc	0.514374	0.70488	nc	nc	nc	nc	nc	nc	nc
LC-MS/MS pharmaceuticals	prescription	amphetamine	0.112164	0.32844	nc	21.9351	2.60828	3.9996	2.793	24.287	nc	nc	nc	nc	nc
LC-MS/MS pharmaceuticals	prescription	atenolol	nc	nc	nc	108.537	24.494	26.928	24.78	156.45	11.2332	0.412426	0.082764	0.63	46.041
LC-MS/MS pharmaceuticals	prescription	bupropion	nc	nc	nc	13.3584	1.09892	2.2836	0.8862	11.5177	8.2731	1.86684	1.19064	1.0941	8.5675
LC-MS/MS pharmaceuticals	nonprescription	caffeine	0.246617	nc	0.97174	4210	517.022	912.12	680.4	10700	23.2254	nc	nc	nc	nc
LC-MS/MS pharmaceuticals	prescription	carbamazepine	0.0102817	0.0055545	0.075306	12.3717	1.38358	2.8116	2.0538	35.313	11.8404	1.35048	3.9732	2.0076	17.135
LC-MS/MS pharmaceuticals	prescription	carisoprodol	0.135891	0.049266	0.81158	1.85196	1.74106	0.48576	0.12033	nc	2.14038	0.55277	0.48444	0.5922	10.2065
LC-MS/MS pharmaceuticals	nonprescription	chlorpheniramine	nc	nc	nc	0.79695	0.120484	0.39336	0.1323	1.8923	nc	nc	nc	nc	nc
LC-MS/MS pharmaceuticals	nonprescription	cimetidine	nc	nc	nc	14.0415	2.1184	1.4388	3.213	26.671	nc	nc	nc	nc	nc
LC-MS/MS pharmaceuticals	prescription	citalopram	nc	nc	nc	11.385	2.57518	4.884	2.31	21.009	2.4288	nc	nc	nc	16.39
LC-MS/MS pharmaceuticals	prescription	codeine	nc	nc	nc	11.2332	1.60204	1.24344	2.247	17.433	nc	nc	nc	nc	7.9268
LC-MS/MS pharmaceuticals	nonprescription	cotinine	0.473821	0.5474	0.0131978	117.645	30.121	26.136	30.45	156.45	1.08537	nc	0.106392	nc	5.0362
LC-MS/MS pharmaceuticals	prescription	desvenlafaxine	0.0199163	nc	0.21098	58.0635	15.8218	26.4	7.56	75.841	28.4625	nc	nc	nc	67.646
LC-MS/MS pharmaceuticals	nonprescription	dextromethorphan	nc	nc	nc	6.42873	0.5627	1.13916	0.84	5.9302	1.9734	nc	nc	nc	5.3193
LC-MS/MS pharmaceuticals	prescription	diazepam	nc	nc	nc	nc	nc	0.19272	nc	nc	nc	nc	0.17028	nc	nc
LC-MS/MS pharmaceuticals	prescription	diltiazem	nc	nc	nc	11.2332	1.86022	4.9896	1.9215	13.0524	1.5939	nc	nc	nc	5.2895
LC-MS/MS pharmaceuticals	nonprescription	diphenhydramine	nc	nc	nc	107.019	12.3132	33.264	21.84	151.98	3.07395	nc	nc	nc	60.643
LC-MS/MS pharmaceuticals	prescription	erythromycin	nc	nc	nc	0.94875	nc	0.26532	nc	8.344	nc	nc	nc	nc	nc
LC-MS/MS pharmaceuticals	nonprescription	famotidine	nc	nc	nc	12.7512	1.94628	1.9404	2.457	28.757	nc	nc	nc	nc	nc
LC-MS/MS pharmaceuticals	prescription	fenofibrate	nc	nc	nc	1.44969	nc	0.30492	nc	4.4402	nc	nc	nc	nc	nc
LC-MS/MS pharmaceuticals	nonprescription	fexofenadine	0.0151709	nc	nc	127.512	19.1318	48.444	25.83	290.55	32.2955	0.068186	nc	nc	189.23
LC-MS/MS pharmaceuticals	prescription	fluconazole	0.0382508	0.020447	0.31878	18.8232	1.17836	4.1712	3.99	34.866	15.18	1.66162	3.9204	3.423	19.221
LC-MS/MS pharmaceuticals	prescription	fluoxetine	nc	nc	nc	nc	0.359466	0.64284	nc	nc	nc	nc	nc	nc	nc
LC-MS/MS pharmaceuticals	prescription	glyburide	nc	nc	nc	0.44781	0.094004	0.081708	0.03003	nc	nc	nc	nc	nc	nc
LC-MS/MS pharmaceuticals	prescription	hydrocodone	nc	nc	nc	2.75517	0.434934	0.94908	1.0353	nc	nc	nc	nc	nc	3.6356
LC-MS/MS pharmaceuticals	prescription	hydroxyzine	nc	nc	nc	2.87661	0.14564	0.108108	0.3549	2.8608	nc	nc	nc	nc	nc
LC-MS/MS pharmaceuticals	nonprescription	ketoconazole	nc	nc	nc	1.64324	nc	1.4388	0.8946	nc	nc	nc	nc	nc	nc
LC-MS/MS pharmaceuticals	prescription	lamivudine	nc	nc	nc	42.9594	nc	2.7324	12.264	129.034	nc	nc	nc	nc	nc
LC-MS/MS pharmaceuticals	nonprescription	lidocaine	1.39486	0.40894	0.9317	40.227	7.7454	10.4412	9.975	69.136	7.56723	nc	nc	nc	55.428
LC-MS/MS pharmaceuticals	prescription	meprobamate	0.0177593	nc	0.22946	25.2747	7.3482	5.6364	1.9719	19.37	18.4437	1.46964	3.6564	3.318	16.837
LC-MS/MS pharmaceuticals	prescription	metaxalone	0.0312765	nc	0.30646	2.30736	1.23794	0.8382	nc	nc	4.15932	nc	nc	nc	nc
LC-MS/MS pharmaceuticals	prescription	metformin	nc	nc	nc	2410	264.138	374.88	157.71	8510	57.8358	nc	nc	nc	384.42
LC-MS/MS pharmaceuticals	prescription	methadone	nc	nc	nc	2.96769	0.161528	0.30624	0.4305	3.2929	0.67513	nc	nc	nc	2.831
LC-MS/MS pharmaceuticals	prescription	methocarbamol	0.0307013	nc	nc	142.692	32.7028	46.332	42.84	204.13	85.767	7.6792	13.464	7.728	150.49
LC-MS/MS pharmaceuticals	prescription	metoprolol	0.0084842	nc	nc	17.9883	6.51408	7.2864	3.885	22.648	9.108	2.979	1.7688	2.31	15.794
LC-MS/MS pharmaceuticals	prescription	morphine	nc	nc	nc	42.1245	2.43616	5.8608	5.229	46.488	nc	nc	nc	nc	nc
LC-MS/MS pharmaceuticals	prescription	nadolol	nc	nc	nc	1.14609	0.93342	0.2376	0.5922	nc	nc	nc	nc	nc	nc
LC-MS/MS pharmaceuticals	prescription	n-desmethyldiltiazem	nc	nc	nc	3.25611	0.70172	1.8216	0.3738	3.4866	1.09296	nc	nc	nc	2.533
LC-MS/MS pharmaceuticals	nonprescription	nicotine	nc	0.98854	nc	248.952	40.051	65.472	76.86	385.91	nc	nc	nc	nc	nc
LC-MS/MS pharmaceuticals	prescription	norverapamil	nc	nc	nc	0.749133	0.11585	0.33	nc	1.9817	nc	nc	nc	nc	nc
LC-MS/MS pharmaceuticals	prescription	oxycodone	nc	nc	nc	5.85948	1.11216	2.0724	0.9681	6.6603	nc	nc	nc	nc	4.6041
LC-MS/MS pharmaceuticals	prescription	penciclovir	nc	nc	nc	11.6127	nc	1.5048	nc	36.803	nc	nc	nc	nc	nc
LC-MS/MS pharmaceuticals	prescription	pentoxifylline	0.0106412	0.01932	nc	1.91268	nc	0.52272	nc	nc	nc	nc	nc	nc	nc
LC-MS/MS pharmaceuticals	prescription	phenytoin	nc	nc	0.2618	6.40217	nc	2.112	nc	nc	6.80064	nc	1.9536	nc	6.7944
LC-MS/MS pharmaceuticals	prescription	propranolol	nc	nc	nc	4.03788	0.99962	2.0592	0.8946	nc	nc	nc	nc	nc	4.3806
LC-MS/MS pharmaceuticals	nonprescription	pseudoephedrine + ephedrine	nc	0.027692	0.23562	100.947	8.606	23.892	17.325	166.88	nc	nc	nc	nc	3.5015
LC-MS/MS pharmaceuticals	prescription	quinine	nc	nc	nc	1.27512	nc	1.01508	0.441	5.6024	nc	nc	nc	nc	nc
LC-MS/MS pharmaceuticals	nonprescription	ranitidine	nc	nc	nc	41.1378	nc	nc	9.114	118.753	nc	nc	nc	nc	nc
LC-MS/MS pharmaceuticals	prescription	sertraline	nc	nc	nc	nc	0.15557	0.2178	nc	nc	nc	nc	nc	nc	nc
LC-MS/MS pharmaceuticals	prescription	sitagliptin	nc	nc	nc	97.152	12.3794	27.324	13.692	150.49	37.1151	5.80574	1.7424	5.775	81.056
LC-MS/MS pharmaceuticals	prescription	sulfamethoxazole	nc	nc	nc	151.8	21.6474	53.196	27.09	121.137	11.8404	nc	0.15708	0.2226	57.216
LC-MS/MS pharmaceuticals	prescription	temazepam	nc	nc	nc	13.1307	3.18422	3.0492	1.7892	nc	11.3091	2.2177	2.3628	2.0412	13.3057
LC-MS/MS pharmaceuticals	prescription	theophylline	nc	nc	nc	195.063	22.839	32.604	36.96	nc	nc	nc	nc	nc	nc
LC-MS/MS pharmaceuticals	prescription	thiabendazole	0.00520556	0.26404	0.18634	1.5939	1.18498	0.41448	0.5628	3.3227	1.19922	0.564024	0.23232	0.2961	2.533
LC-MS/MS pharmaceuticals	prescription	tramadol	0.0344401	nc	0.08855	50.7012	8.2088	11.9856	10.605	71.073	8.78922	nc	nc	nc	55.13
LC-MS/MS pharmaceuticals	prescription	triamterene	0.00213543	nc	nc	4.7058	1.64838	2.4948	1.5792	8.4334	1.54077	nc	nc	nc	6.9285
LC-MS/MS pharmaceuticals	prescription	trimethoprim	nc	nc	nc	44.1738	5.04444	10.5204	7.581	59.451	2.7324	nc	nc	nc	17.731
LC-MS/MS pharmaceuticals	prescription	valacyclovir	nc	nc	nc	17.0016	nc	nc	nc	nc	nc	nc	nc	nc	nc
LC-MS/MS pharmaceuticals	prescription	venlafaxine	0.0125825	nc	nc	17.6847	4.2037	7.3128	2.31	25.628	3.38135	nc	nc	nc	27.118
LC-MS/MS pharmaceuticals	prescription	verapamil	nc	nc	nc	2.62614	0.346226	1.19856	0.4872	4.8276	nc	nc	nc	nc	1.7284
#Table SI-6. Load estimates for target-organic chemicals (in grams per day) detected in landfill leachate, wastewater influent (-INF), and wastewater effluent (-EF) samples. Sorted alphabetically by analytical method then by parameter name.
#[*, Load is based on the median concentration from five WWTP A-INF or five WWTP A-EF samples collected from 10-19-2016 @ 15:00 to 10-20-2016 @ 12:45, see Table SI-3.]
#[ LC-MS/MS, liquid chromatography-tandem mass spectrometry; GC-MS/MS, gas chromatography-tandem mass spectrometry; PFAS, per-/poly-fluoroalkyl substance(s)]
#[nc, not calculated due to non-detect]
